# Supplementary figures and images for: A Lifesaving View of Vascularized Composite Allotransplantation: Patient Experience of Social Death Before and After Face, Hand, and Larynx Transplant
Source: PubMed Central journal article supplement — J Patient Exp. 2017 Oct 6;5(2):92–100. doi: 10.1177/2374373517730556 (PMC6022947; doi:10.1177/2374373517730556), 2017-10-06

Supplement File

Social Death and Vascularized Composite Allotransplantation Concept Map

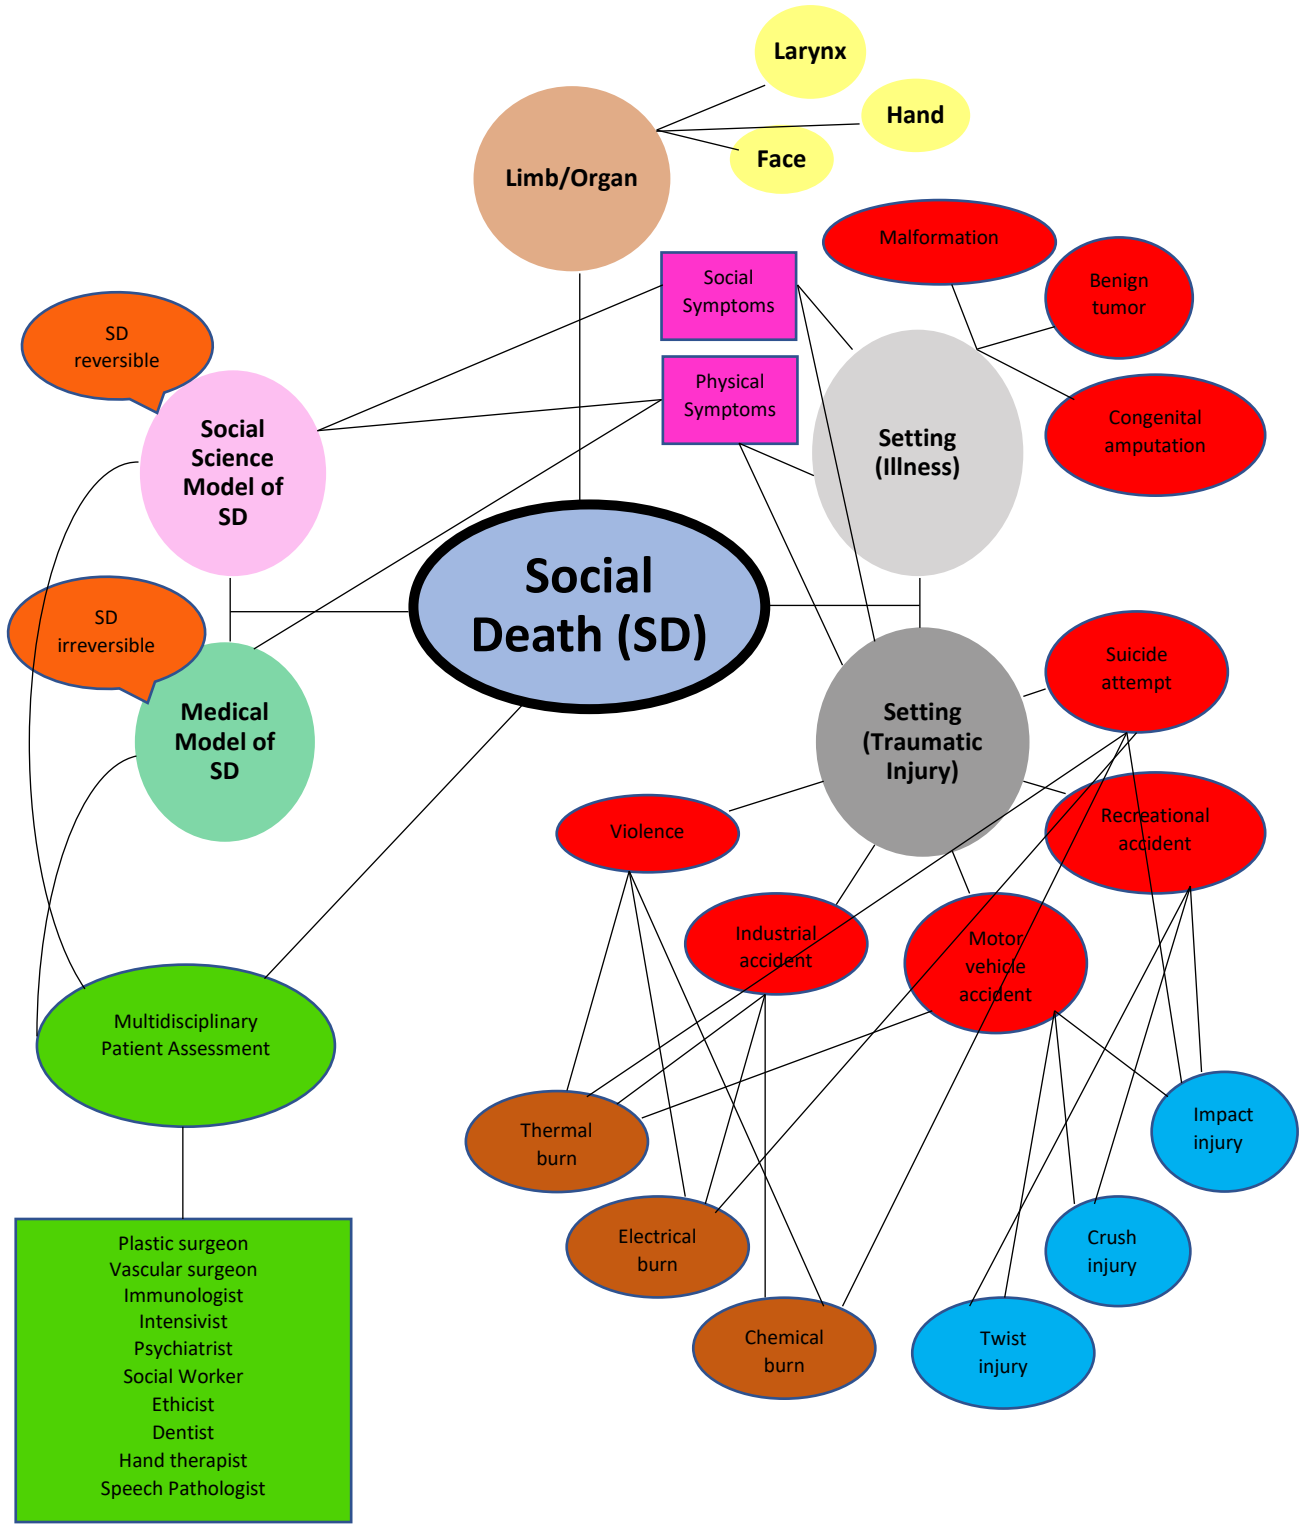

Supplement: supplementary_material.pdf [file supplementary_material.pdf]
